# Supplementary material
Source: PubMed Central journal article supplement (PMC2481377)
Supplement: 0803636105_0803636105SI.pdf [file 0803636105_0803636105SI.pdf]

# Supporting Information

McCormick *et al.* 10.1073/pnas.0803636105

## SI Materials and Methods

**Vaccine Production and Treatment.** Tumor biopsy specimens were prepared as sterile single cell suspensions containing 10% DMSO and stored in liquid nitrogen. RNA was isolated from approximately  $5 \times 10^6$  cells using standard methods (RNeasy; Qiagen). Poly(A)-positive mRNA was isolated with oligo(dT) beads (Dynal) and cDNA was produced by standard techniques. The tumor-specific variable regions were amplified by polymerase chain reaction (PCR) using 5' RACE (rapid amplification of cDNA ends) of G-tailed cDNA with C anchor 5' primer and C<sub>H</sub>1 specific 3' primers (1, 2). Amplifications were performed in duplicate. Tumor gene sequences were obtained by direct sequencing of the PCR product and verified by cloning and subsequent sequencing of 48 of the independent isolates of each cloned chain. Cloned patient variable region genes and specific primers were used to assemble the scFv by PCR where the linker region of the scFv was generated by amplification using primers containing a semirandom sequence (3).

PCR-generated inserts were ligated into a modified tobacco mosaic virus (TMV) expression vector (4–6) to create a set of ~100 idiotypic-derived scFv, each containing a variable linker sequence. These scFv constructs were subsequently screened *in planta* for expression and folding optimization as described previously (3). For each patient, the TMV expression vector containing the optimized scFv expression construct that yielded high levels of full-length protein was transcribed *in vitro* using a T7 promoter in the vector. The resulting RNA transcripts were inoculated onto *Nicotiana benthamiana* plants using a mild abrasive to facilitate virus infection. Eleven days after inoculation, leaves from 1,000 plants were harvested and subjected to vacuum infiltration as previously described (7). Interstitial fluid (IF) containing the secreted scFv protein was recovered by centrifugation, filtered, concentrated, and subjected to ion exchange chromatography. Fractions containing the scFv were pooled, brought to 25% ammonium sulfate and purified on Phenyl Sepharose HP (Amersham Pharmacia) followed by Hy-

droxyapatite Type I chromatography (Bio-Rad). Fractions containing purified scFv product were pooled, concentrated and diafiltered into phosphate-buffered saline (PBS), pH 7.4 and sterile filled into polypropylene vials. In one case, Patient #16, a His-tag version of the scFv protein was produced and purified using nickel affinity chromatography as the initial capture step. All scFv vaccines were manufactured under FDA current good manufacturing practice (cGMP) guidelines.

**Vaccine Release and Glycan Analysis.** The quality of vaccine products was monitored using cGMP Quality Control (QC) and Quality Assurance (QA) guidelines. Product release assays were used to assess product identity and tumor relevance, purity, potency, and other product properties including safety. The absence of infectious TMV vector was confirmed by local lesion assay using *Nicotiana tabacum* NN leaf inoculation methods. The quality of the vaccine products was also monitored during a 12–24 month stability study using a subset of the product release tests used for clinical application (8).

Glycan analysis, presented in Table 2, was carried out as described in detail elsewhere (9, 10). Briefly, each patient's scFv sequence was analyzed for expected glycosylation sites based on the presence of an N-glycosylation sequence, Asn-X-Ser/Thr. Patient scFv protein was analyzed by MALDI-TOF mass analysis, and initially the number of glycosylation sites occupied were determined by the difference in mass from the expected amino acid weight based on protein sequence and observed mass, divided by the average glycan mass of 1,220 Da. Glycosylation is also clearly observed in the differential migration of scFv proteins by SDS-PAGE analysis (Fig. 1). Additional analyses by tryptic digestion of scFv protein, to generate peptide fragments predicted to contain N-linked glycosylation sites, were further analyzed by MALDI-TOF. The presence of glycan occupation was confirmed, and the mass of each glycan was established (9). The exact composition of glycan identity will be presented elsewhere (F.V., K.M.H., and E.L.W., unpublished data).

1. Ferradini L, *et al.* (1993) The use of anchored polymerase chain reaction for the study of large numbers of human T-cell receptor transcripts. *Mol Immunol* 30:1143–1150.
2. Osterroth F, *et al.* (1999) Rapid expression cloning of human immunoglobulin Fab fragments for the analysis of antigen specificity of B cell lymphomas and anti-idiotypic lymphoma vaccination. *J Immunol Methods* 229:141–153.
3. McCormick AA, *et al.* (2003) Individualized human scfv vaccines produced in plants: Humoral anti-idiotypic responses in vaccinated mice confirm relevance to the tumor rig. *J Immunol Methods* 278:95–104.
4. Kumagai MH, *et al.* (1993) Rapid, high-level expression of biologically active  $\alpha$ -trichosanthin in transfected plants by an RNA viral vector. *Proc Natl Acad Sci USA* 90:427–430.
5. Donson J, Kearney CM, Hilf ME, Dawson WO (1991) Systemic expression of a bacterial gene by a tobacco mosaic virus-based vector. *Proc Natl Acad Sci USA* 88:7204–7208.
6. Pogue GP, Lindbo JA, Garger SJ, Fitzmaurice WP (2002) Making an ally from an enemy: Plant virology and the new agriculture. *Annu Rev Phytopathol* 40:45–74.
7. McCormick AA, *et al.* (1999) Rapid production of specific vaccines for lymphoma by expression of the tumor-derived single-chain fv epitopes in tobacco plants. *Proc Natl Acad Sci USA* 96:703–708.
8. Hanley KM, *et al.* (2003) *Proc Am Soc Mass Spec Conf Mass Spec Allied Topics* 51:150.
9. White E L, *et al.* (2003) *Proc Am Soc Mass Spec Conf Mass Spec Allied Topics* 51:314.

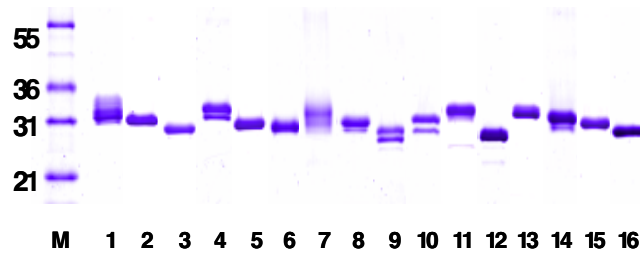

**Fig. S1.** SDS-PAGE analysis of independently produced scFv vaccines. Each scFv vaccine from final formulation vial was separated by SDS-PAGE (1  $\mu$ g/lane; Invitrogen 10–20% Tris-Glycine gel) and stained with Coomassie Brilliant Blue. A molecular weight marker (Mark 12) is shown in lane marked “M” and vaccines are numbered corresponding to the patient number (1–16) that received the materials.

**Table S1. Vaccine release specifications and associated testing methods**

| Test                                                | Specification                                                                                                                                                                                                                                                                                                                                                                                                |
|-----------------------------------------------------|--------------------------------------------------------------------------------------------------------------------------------------------------------------------------------------------------------------------------------------------------------------------------------------------------------------------------------------------------------------------------------------------------------------|
| Release                                             |                                                                                                                                                                                                                                                                                                                                                                                                              |
| SDS-PAGE/densitometry                               | Proteins were separated by SDS-PAGE, stained with Coomassie Brilliant Blue, and measured using calibrated imaging densitometry. 90% protein in the molecular weight range of 28.5 kDa, $\pm$ 20% and of truncated species as calculated (including truncated species, if present). If truncated species are used to obtain 90% protein specification, they must be verified by tryptic peptide mass mapping. |
| N-terminal amino acid sequence                      | The first 10 residues of sequence must match the predicted N-terminal sequence with a maximum of one unresolved residue.                                                                                                                                                                                                                                                                                     |
| Molecular weight                                    | The MALDI-TOF MS molecular mass measurement must match either the calculated molecular mass or the calculated mass + allowance for glycosylation (~1200 Da, each oligosaccharide) based on predicted number of glycosylation sites.                                                                                                                                                                          |
| Tryptic peptide mass measurement                    | The molecular masses for at least three different unmodified tryptic peptide fragments, determined by MALDI-TOF MS, must match the corresponding theoretical unmodified tryptic peptide fragments.                                                                                                                                                                                                           |
| Appearance                                          | Clear, colorless solution, free of particulates.                                                                                                                                                                                                                                                                                                                                                             |
| Endotoxin                                           | Endotoxin < 10 EU/dose                                                                                                                                                                                                                                                                                                                                                                                       |
| Residual DNA                                        | <10 ng/dose                                                                                                                                                                                                                                                                                                                                                                                                  |
| Sterility                                           | Sterile as judged by 21 CFR610.12 assay.                                                                                                                                                                                                                                                                                                                                                                     |
| pH                                                  | 7.3 $\pm$ 0.3 pH units                                                                                                                                                                                                                                                                                                                                                                                       |
| Protein concentration                               | Final vial concentration must be: 4.0 mg/ml $\pm$ 0.8 mg/ml OR 0.4 mg/ml $\pm$ 0.08 mg/ml, as indicated.                                                                                                                                                                                                                                                                                                     |
| For information only                                |                                                                                                                                                                                                                                                                                                                                                                                                              |
| Small-molecule impurities                           | Impurity concentration reported for 1-methyl-2-[3-pyridyl]-pyrrolidine (nicotine), phenyl methyl sulfonyl fluoride (PMSF) and 2-mercaptoethanol (BME).                                                                                                                                                                                                                                                       |
| Molecular weight and structural analysis of glycans | Glycan MW and structure reported by protease digestion of vaccines, enzymatic deglycosylation, glycan derivatization and analysis by LC-MS/MS using appropriate standards.                                                                                                                                                                                                                                   |
| Infectious particles                                | Absence of infectious TMV reported by inoculation of <i>Nicotiana tabacum</i> NN plants with vaccines at a concentration of 4.0 mg/ml and lack of local lesions on inoculated leaves.                                                                                                                                                                                                                        |
